# Supplementary material for: Social Media Use in Interventions for Diabetes: Rapid Evidence-Based Review
Source: PubMed Central journal article supplement (PMC6109225; doi:10.2196/10303), 2018-08-10
Supplement: jmir_v20i8e10303_app1.pdf [file jmir_v20i8e10303_app1.pdf]

| <b>DATABASE</b> | <b>SEARCH ENGINE</b>                                                                                                                                                                                                       | <b>OUTPUT</b> |
|-----------------|----------------------------------------------------------------------------------------------------------------------------------------------------------------------------------------------------------------------------|---------------|
| PubMed          | Social media[Title/Abstract] AND Diabetes[Title/Abstract]                                                                                                                                                                  | 132           |
| PubMed          | Social networking[Title/Abstract] AND Diabetes[Title/Abstract]                                                                                                                                                             | 48            |
| PubMed          | Facebook[Title/Abstract] AND Diabetes[Title/Abstract]                                                                                                                                                                      | 36            |
| PubMed          | Twitter[Title/Abstract] AND Diabetes[Title/Abstract]                                                                                                                                                                       | 25            |
| PubMed          | YouTube[Title/Abstract] AND Diabetes[Title/Abstract]                                                                                                                                                                       | 9             |
| PubMed          | "Social Media"[Mesh] AND "Diabetes Mellitus"[Mesh]                                                                                                                                                                         | 54            |
| PubMed          | "Social Media"[Mesh] AND "Diabetes Insipidus"[Mesh]                                                                                                                                                                        | 0             |
| PubMed          | "Social Media"[Mesh] AND "Diabetes, Gestational"[Mesh]                                                                                                                                                                     | 0             |
| Scopus          | TITLE-ABS-KEY ("Social media") AND TITLE-ABS-KEY (*diabetes) AND (LIMIT-TO [DOCTYPE, "ar"] OR LIMIT-TO [DOCTYPE, "cp"]) AND (LIMIT-TO [LANGUAGE, "English"]) AND (LIMIT-TO [SRCTYPE, "j"] OR LIMIT-TO [SRCTYPE, "p"])      | 195           |
| Scopus          | TITLE-ABS-KEY ("Social networking") AND TITLE-ABS-KEY (*diabetes) AND (LIMIT-TO [SRCTYPE, "j"] OR LIMIT-TO [SRCTYPE, "p"]) AND (LIMIT-TO [DOCTYPE, "ar"] OR LIMIT-TO [DOCTYPE, "cp"]) AND (LIMIT-TO [LANGUAGE, "English"]) | 146           |
| Scopus          | TITLE-ABS-KEY ("Facebook") AND TITLE-ABS-KEY (*diabetes) AND (LIMIT-TO [SRCTYPE, "j"] OR LIMIT-TO [SRCTYPE, "p"]) AND (LIMIT-TO [DOCTYPE, "ar"] OR LIMIT-TO [DOCTYPE, "cp"]) AND (LIMIT-TO [LANGUAGE, "English"])          | 45            |
| Scopus          | TITLE-ABS-KEY ("Twitter") AND TITLE-ABS-KEY (*diabetes) AND (LIMIT-TO [SRCTYPE, "j"] OR LIMIT-TO [SRCTYPE, "p"]) AND (LIMIT-TO [DOCTYPE, "ar"] OR LIMIT-TO [DOCTYPE, "cp"]) AND (LIMIT-TO [LANGUAGE, "English"])           | 43            |
| Scopus          | TITLE-ABS-KEY ("Yotube") AND TITLE-ABS-KEY (*diabetes) AND (LIMIT-TO [SRCTYPE, "j"] OR LIMIT-TO [SRCTYPE, "p"]) AND (LIMIT-TO [DOCTYPE, "ar"] OR LIMIT-TO [DOCTYPE, "cp"]) AND (LIMIT-TO [LANGUAGE, "English"])            | 13            |

|                  |                                                                                              |     |
|------------------|----------------------------------------------------------------------------------------------|-----|
| EMBASE           | ([exp *social media].ti,ab,kw. AND exp *diabetes).ti,ab,kw. Limit to (English language)      | 362 |
| EMBASE           | ([exp *social networking].ti,ab,kw. AND exp *diabetes).ti,ab,kw. Limit to (English language) | 77  |
| EMBASE           | ([exp *Facebook].ti,ab,kw. AND exp *diabetes).ti,ab,kw. Limit to (English language)          | 103 |
| EMBASE           | ([exp *Twitter].ti,ab,kw. AND exp *diabetes).ti,ab,kw. Limit to (English language)           | 63  |
| EMBASE           | ([exp *YouTube].ti,ab,kw. AND exp *diabetes).ti,ab,kw. Limit to (English language)           | 10  |
| Cochrane Library | “‘Social media’ AND ‘Diabetes’ in Title, Abstract, Keywords in Other Reviews”                | 5   |
| Cochrane Library | “‘Social networking’ AND ‘Diabetes’ in Title, Abstract, Keywords in Other Reviews”           | 7   |
| Cochrane Library | “‘Facebook’ AND ‘Diabetes’ in Title, Abstract, Keywords in Other Reviews”                    | 5   |
| Cochrane Library | “‘Twitter’ AND ‘Diabetes’ in Title, Abstract, Keywords in Other Reviews”                     | 3   |
| Cochrane Library | “‘YouTube’ AND ‘Diabetes’ in Title, Abstract, Keywords in Other Reviews”                     | 2   |
